# Supplementary material for: A rhodamine-based fluorescent probe for Fe3+: synthesis, theoretical calculation and bioimaging application
Source: Royal Society of Chemistry journal article supplement (doi:10.1039/c9ay00499h), 2019-01-01
Supplement: c9ay00499h1.pdf [file c9ay00499h1.pdf]

# A Rhodamine-Based Fluorescent Probe for Fe<sup>3+</sup>: Synthesis, Theoretical Calculation and Bioimaging Application

## Supporting Information

Zhao Cheng,<sup>a\*</sup> Lei Zheng,<sup>a</sup> Hao Xu,<sup>b</sup> Long Pang<sup>b</sup> and Hao He<sup>a</sup>

<sup>a</sup>. School of Pharmaceutical, Xi'an Medical University, Xi'an, Shaanxi 710021, PR China

<sup>b</sup>. School of Basic Medical Sciences, Xi'an Medical University, Xi'an, Shaanxi 710021, PR China

\*E-mail: chengzhao@xiyi.edu.cn

\*Tel: +86 029-86177549

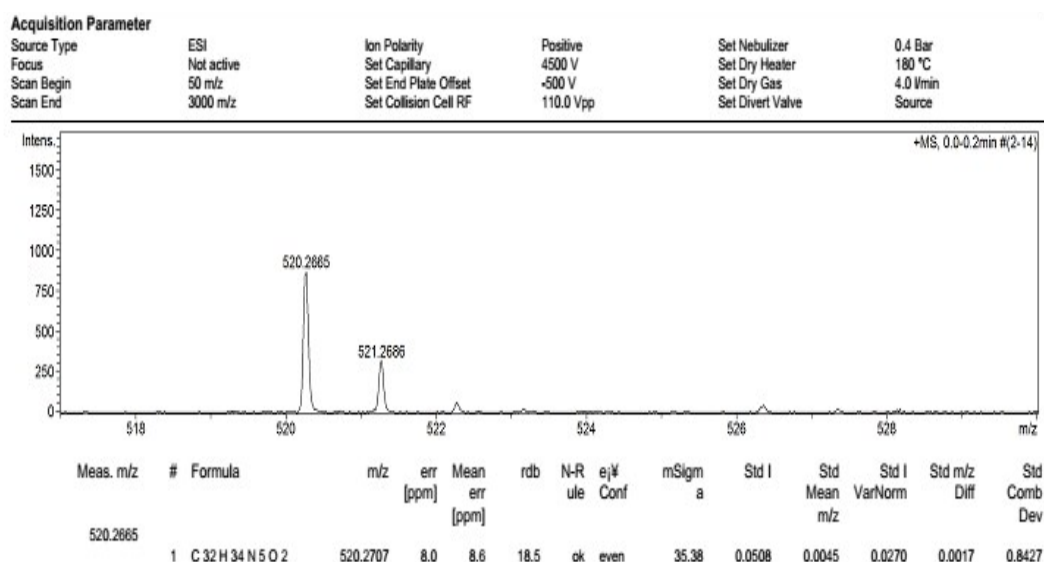

Fig. S1 HRMS of J1

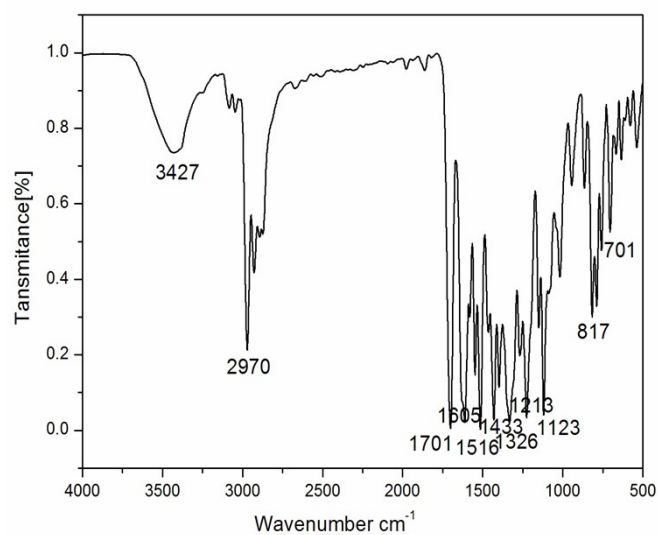

Fig. S2 IR of J1

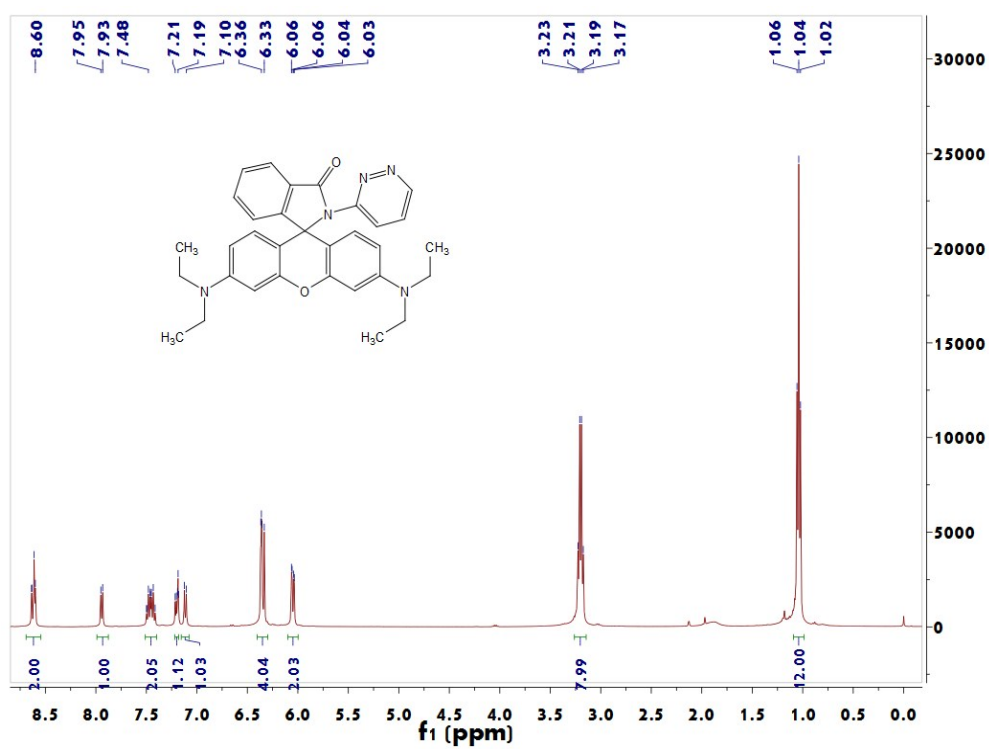

Fig. S3 <sup>1</sup>H NMR of J1

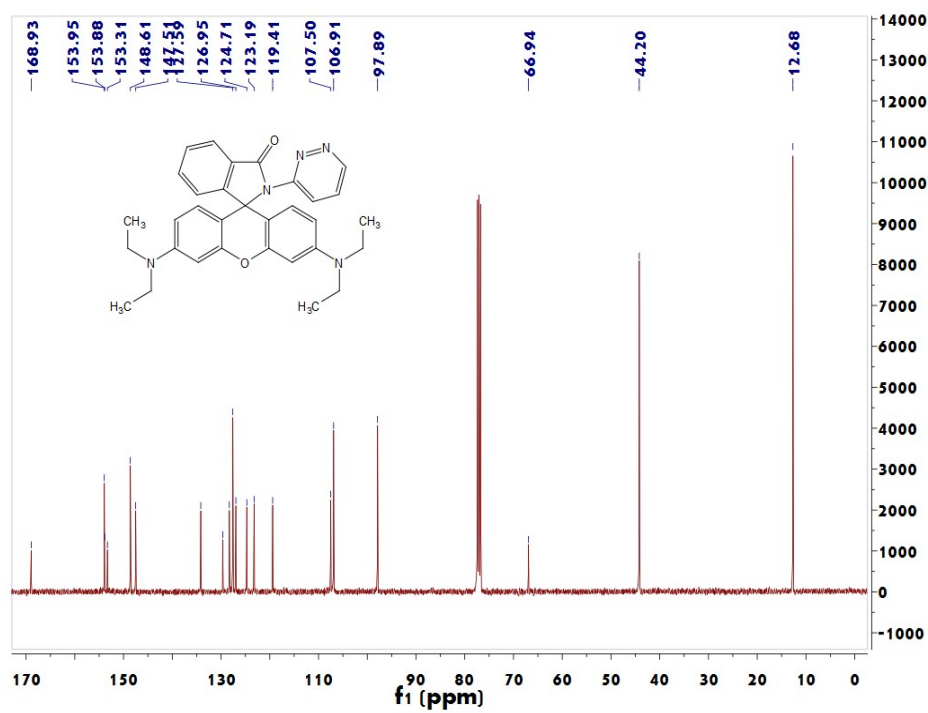

Fig. S4  $^{13}\text{C}$  NMR of J1
